# Supplementary material for: Micro-level prediction of outstanding claim counts based on novel mixture models and neural networks
Source: Springer Nature journal article supplement (doi:10.1007/s13385-022-00314-4), 2022-05-12
Supplement: MOESM2 [file 20397724]

# Supplementary Material: Mirco-level Prediction of Outstanding Claim Counts using Neural Networks

*Axel Bücher and Alexander Rosenstock*

An R-File containing the functions used for the simulation study can be found on GitHub under the following link:

<https://gist.github.com/AshesITR/d3023021e3e86ceb7ad661e91d5bc458>
